# Supplementary material for: Curcumin-loaded albumin submicron particles with potential as a cancer therapy: an in vitro study
Source: publisher site journal article supplement (doi:10.3762/bjnano.14.93), 2023-11-21
Supplement: Additional file 1 [file 2190-4286-14-93-S1.pdf]

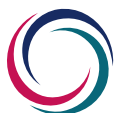

## Supporting Information

for

### **Curcumin-loaded albumin submicron particles with potential as a cancer therapy: an in vitro study**

Nittiya Suwannasom, Netsai Sriaksorn, Chutamas Thepmalee, Krissana Khoothiam, Ausanai Prapan, Hans Bäumlner and Chonthida Thephinlap

*Beilstein J. Nanotechnol.* **2023**, *14*, 1127–1140. [doi:10.3762/bjnano.14.93](https://doi.org/10.3762/bjnano.14.93)

## Additional experimental data

**Table S1:** Size and zeta potential of HSA-MPs and CUR-HSA-MPs.<sup>a</sup>

| Particle    | Size                |                 |                  | Zeta potential                                            |                  |
|-------------|---------------------|-----------------|------------------|-----------------------------------------------------------|------------------|
|             | Z-Average Size (nm) | PDI             | ZP (mV)          | Mob ( $\mu\text{m}\cdot\text{cm}/\text{V}\cdot\text{s}$ ) | Cond (mS/cm)     |
| HSA-MPs     | $888.88 \pm 64$     | $0.3 \pm 0.14$  | $-14.50 \pm 0.6$ | $-1.12 \pm 0.05$                                          | $18.38 \pm 0.18$ |
| CUR-HSA-MPs | $983.57 \pm 82$     | $0.31 \pm 0.13$ | $-15.34 \pm 0.2$ | $-1.21 \pm 0.01$                                          | $18.10 \pm 0.07$ |

<sup>a</sup>Data are presented as mean  $\pm$  SD ( $n = 3$ ); conductivity (Cond), electrophoretic mobility unit (Mob), polydispersity index (PDI), and zeta potential (ZP).

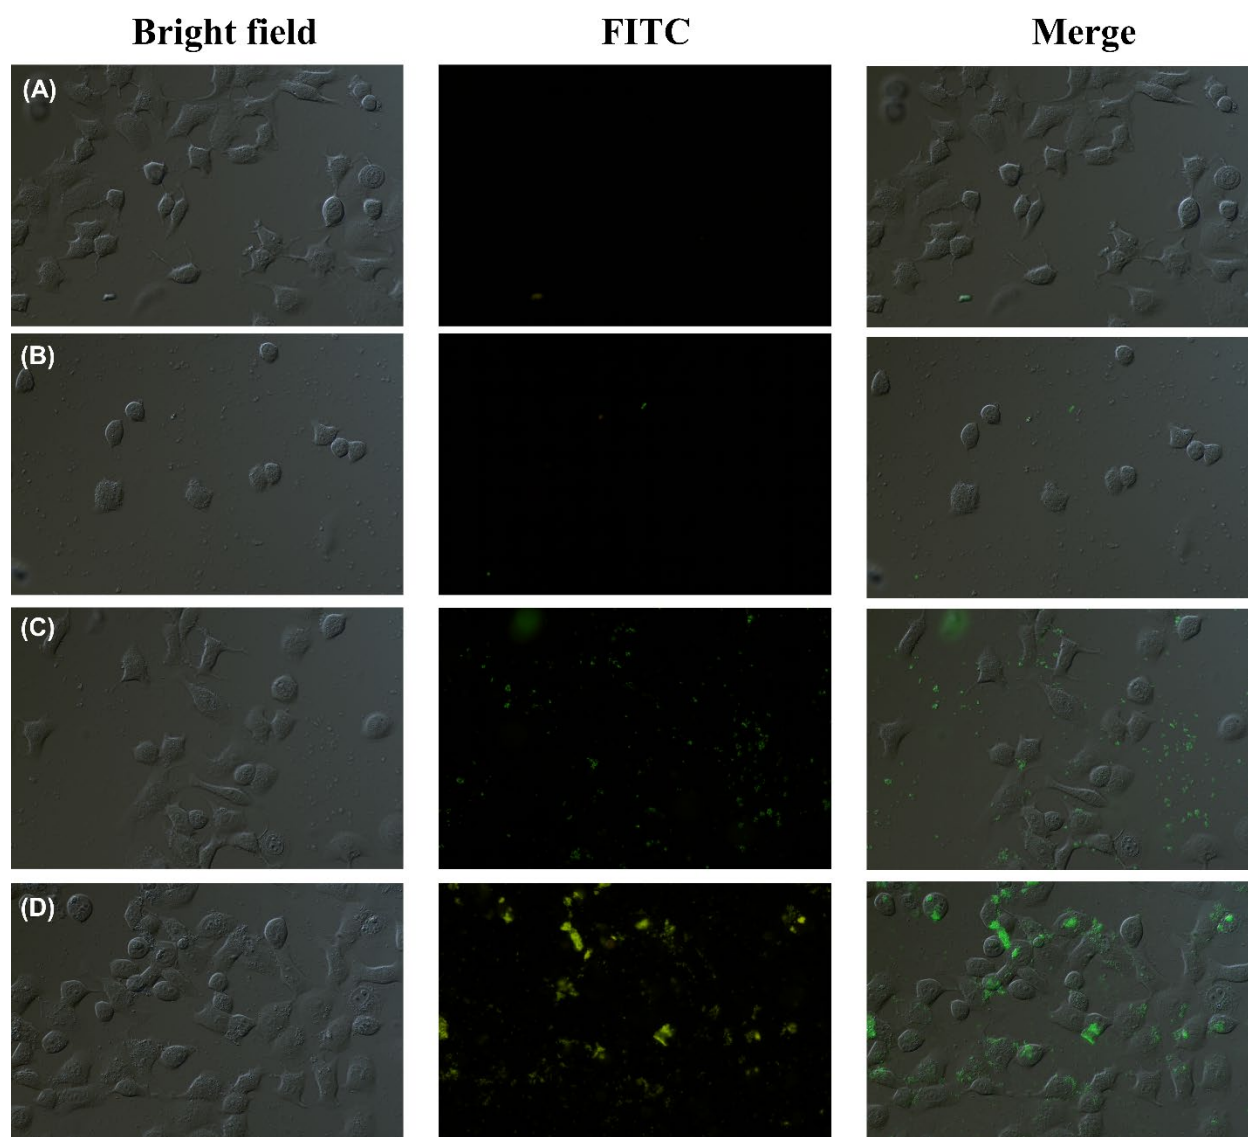

**Figure S1:** Cellular uptake of CUR at 4 h in MCF-7 cell (A), free CUR (B), FITC-HSA-MPs (C), FITC-CUR-HSA-MPs in MCF-7 cell using fluorescence microscopy. A and B show fluorescent images of non-treated and free curcumin-treated samples to verify the presence of cell autofluorescence. C and D show the uptake of microparticles, which can be seen the fluorescence is diffused throughout the cytoplasm.
